# Supplementary material
Source: PubMed Central journal article supplement (PMC3098910)
Supplement: NIHMS288447-supplement-Supplementary_Info.pdf [file NIHMS288447-supplement-Supplementary_Info.pdf]

## Supplementary Information

### Tables

**Supplementary Table 1:** Disulfide bond features. Table showing the C<sub>α</sub>-C<sub>α</sub> distance of the cystines in CDR H1 and H3 loops that form a disulfide bond. Details on the position of the cystines are also shown. <sup>s</sup>stretched twist, <sup>t</sup>twist.

| PDB ID             | H3 Length | Cys(C <sub>α</sub> )-Cys(C <sub>α</sub> ) (Å) | Cys Position in H1 | Cys Position in H3 | Relative Position of Cys in H3 |       | H3 Midpoint |
|--------------------|-----------|-----------------------------------------------|--------------------|--------------------|--------------------------------|-------|-------------|
|                    |           |                                               |                    |                    | End                            | Start |             |
| 1YC7               | 10        | 4.0                                           | 32                 | 96                 | <i>n</i> -8                    | 2     | 5.0         |
| 1ZV5 <sup>t</sup>  | 12        | 6.1                                           | 33                 | 100B               | <i>n</i> -4                    | 8     | 6.0         |
| 1RI8 <sup>s</sup>  | 17        | 5.7                                           | 33                 | 100B               | <i>n</i> -9                    | 8     | 8.5         |
| 1F2X <sup>t</sup>  | 19        | 5.7                                           | 33                 | 100C               | <i>n</i> -10                   | 9     | 9.5         |
| 1RJC <sup>s</sup>  | 19        | 5.9                                           | 33                 | 100D               | <i>n</i> -9                    | 10    | 9.5         |
| 1JTO <sup>s</sup>  | 24        | 5.7                                           | 33                 | 100E               | <i>n</i> -13                   | 11    | 12.0        |
| 1MEL <sup>s</sup>  | 24        | 5.7                                           | 33                 | 100E               | <i>n</i> -13                   | 11    | 12.0        |
| 1XFP <sup>s</sup>  | 24        | 5.7                                           | 33                 | 100E               | <i>n</i> -13                   | 11    | 12.0        |
| 1ZMY <sup>s</sup>  | 24        | 5.8                                           | 33                 | 100E               | <i>n</i> -13                   | 11    | 12.0        |
| Mean Distance      |           | 5.6                                           |                    |                    |                                |       |             |
| Standard Deviation |           | 0.6                                           |                    |                    |                                |       |             |

**Supplementary Table 2:** Comparison of different loop building techniques for long CDR H3 loops ( $n_{H3} \geq 16$  residues) using global rmsds. *LowE*, *LowRMS* and *LowALL* indicates the lowest-scoring CDR H3 loop model, the CDR H3 with the lowest global rmsd in the ten-lowest scoring models and the model with the lowest global-rmsd observed respectively. <sup>s</sup> and <sup>t</sup> indicates structures whose CDR H3 loops adopt the stretched-twist and twist conformations respectively. <sup>c</sup> indicates that the native contains a disulfide bond between CDRs H1 and H3.

| No. of models       |    | No constraints with nine residue fragments only (Å) |               |      | Constraints with nine residue fragments only (Å) |        |      | Constraints with three residue fragments following nine residue fragments (Å) |        |      |        |        |      |
|---------------------|----|-----------------------------------------------------|---------------|------|--------------------------------------------------|--------|------|-------------------------------------------------------------------------------|--------|------|--------|--------|------|
|                     |    | 5,000                                               |               |      | 5,000                                            |        |      | 5,000                                                                         |        |      | 20,000 |        |      |
|                     |    | PDB ID                                              | CDR H3 length | LowE | LowRMS                                           | LowALL | LowE | LowRMS                                                                        | LowALL | LowE | LowRMS | LowALL | LowE |
| 1ZVH <sup>s</sup>   | 16 | 7.3                                                 | 3.3           | 2.9  | 5.3                                              | 2.3    | 2.2  | 4.5                                                                           | 3.4    | 2.3  | 4.9    | 3.2    | 2.3  |
| 1UOQ <sup>s,c</sup> | 16 | 2.6                                                 | 2.6           | 2.5  | 3.0                                              | 2.8    | 2.8  | 2.8                                                                           | 2.8    | 2.8  | 3.1    | 2.8    | 2.1  |
| 3DWT <sup>s</sup>   | 16 | 8.0                                                 | 3.3           | 2.6  | 4.2                                              | 3.1    | 2.5  | 3.3                                                                           | 3.3    | 2.6  | 3.2    | 3.2    | 2.6  |
| 1QD0 <sup>s</sup>   | 16 | 7.4                                                 | 3.1           | 2.5  | 1.5                                              | 1.5    | 1.5  | 0.9                                                                           | 0.9    | 0.9  | 0.9    | 0.9    | 0.9  |
| 1MVF <sup>s</sup>   | 17 | 9.3                                                 | 4.0           | 3.5  | 4.0                                              | 3.9    | 3.2  | 3.4                                                                           | 3.4    | 3.4  | 2.3    | 2.3    | 1.8  |
| 1R18 <sup>s,c</sup> | 17 | 10.0                                                | 4.6           | 4.0  | 4.8                                              | 3.3    | 2.7  | 5.1                                                                           | 4.0    | 2.6  | 3.6    | 2.6    | 2.5  |
| 1ZVY <sup>s</sup>   | 18 | 6.6                                                 | 6.6           | 3.0  | 3.9                                              | 3.1    | 2.8  | 4.3                                                                           | 3.3    | 3.0  | 4.3    | 3.4    | 2.2  |
| 1F2X <sup>t,c</sup> | 19 | 14.7                                                | 9.0           | 4.5  | 5.4                                              | 4.6    | 3.5  | 3.9                                                                           | 3.9    | 3.3  | 5.7    | 3.3    | 3.0  |
| 1RJC <sup>s,c</sup> | 19 | 7.1                                                 | 6.3           | 4.4  | 2.5                                              | 2.5    | 2.5  | 3.6                                                                           | 3.6    | 2.8  | 3.6    | 2.0    | 2.0  |
| 1JTO <sup>s,c</sup> | 24 | 10.8                                                | 5.2           | 4.8  | 4.5                                              | 4.1    | 3.7  | 6.7                                                                           | 4.3    | 3.4  | 5.4    | 4.3    | 3.4  |
| 1MEL <sup>s,c</sup> | 24 | 18.6                                                | 6.2           | 3.6  | 5.1                                              | 4.6    | 3.5  | 4.0                                                                           | 4.0    | 3.8  | 6.3    | 4.0    | 3.3  |
| 1XFP <sup>s,c</sup> | 24 | 12.9                                                | 9.4           | 5.2  | 5.0                                              | 5.0    | 3.2  | 4.2                                                                           | 4.2    | 3.9  | 4.5    | 4.2    | 3.4  |
| 1ZMY <sup>s,c</sup> | 24 | 7.8                                                 | 7.6           | 4.8  | 4.6                                              | 4.6    | 3.6  | 3.9                                                                           | 3.9    | 3.8  | 4.0    | 3.9    | 3.3  |
| Median              |    | 8.0                                                 | 5.2           | 3.6  | 4.5                                              | 3.3    | 2.8  | 3.9                                                                           | 3.6    | 3.0  | 4.0    | 3.2    | 2.5  |

## ***Figure***

**Supplementary Figure 1:** Sequence alignment of cAb V<sub>H</sub>H and classical V<sub>H</sub>S. The camelid V<sub>H</sub>H are listed first with the letter “A” following the four letter PDB ID. Red (\*) and black stars (\*) indicate alignment positions of newly and previously discovered amino acid mutations. The classical V<sub>H</sub>S have the letter “H” following their PDB IDs. The CDR regions are annotated in red. Basic: K,R (red); Hydrophobic: A,F,I,L,M,V,W (blue); Polar: N,Q,S,T (green); H,Y (cyan); C (salmon); Acidic: D,E (magenta); Proline (yellow); Glycine (orange).



←-----H3----->

|        |            |            |            |  |  |   |           |            |            |     |
|--------|------------|------------|------------|--|--|---|-----------|------------|------------|-----|
| 101    | *          | *          |            |  |  |   | *         | *          | *          | *   |
| 1bzq.A | EDTAVYCAA  | GGYELRDRT  |            |  |  |   | YGQWGGTQ  | VTVS       |            |     |
| 1f2x.A | EDTAIYACAG | STVASTGWCS | RLRPYD     |  |  |   | YHYRGGTQ  | VTVSS      |            |     |
| 1g9e.A | EDTAVYTCGA | GEGGT      |            |  |  |   | WDSWGGTQ  | VTVS       |            |     |
| 1hcv.A | EDTAVYTCGA | GEGGT      |            |  |  |   | WDSWGGTQ  | VTVSS      |            |     |
| 1i3v.A | EDTAVYCAA  | KTTTWGGNDP | NN         |  |  |   | WNYWGGTQ  | VTVSS      |            |     |
| 1ieh.A | EDTAVYCAK  | YSGGA      |            |  |  |   | LDAWGGTQ  | VTVSSQSEOK | LISEEDLNHH | HHH |
| 1jto.A | EDTAIYCAA  | DSTIYASYE  | CGHGLSTGGY |  |  |   | GYDSWGGTQ | VTVSS      |            |     |
| 1kxq.A | EDTGIYCAT  | GNSVRLASWE | G          |  |  |   | YFYWGGTQ  | VTVSS      |            |     |
| 1me1.A | EDTAIYCAA  | DSTIYASYE  | CGHGLSTGGY |  |  |   | GYDSWGGTQ | VTVS       |            |     |
| 1mvf.A | EDTAMYCAA  | SSRWMDYSAL | TAKA       |  |  |   | YNSWGGTQ  | VTVSSR     |            |     |
| 1op9.A | EDTAMYCAA  | TEVAGWPLDI | GI         |  |  |   | YDYWGGTE  | VTVSS      |            |     |
| 1qd0.A | EDTAVYCAA  | RPVRVADISL | PVG        |  |  |   | FDYWGGTQ  | VTVSS      |            |     |
| 1ri8.A | EDTAMYCAA  | GWSSLGSCGT | NRNR       |  |  |   | YNYWGGTQ  | VTVSS      |            |     |
| 1rjc.A | EDTAMYCAA  | DTSTWYRGYC | GTNPNY     |  |  |   | FSYWGGTQ  | VTVS       |            |     |
| 1shm.A | EDTAVYTCGA | GRIGRSVFNL | RRESW      |  |  |   | VTWGGTQ   | VTVSS      |            |     |
| 1sxx.A | EDTAVYCAA  | EDRHRIGT   |            |  |  |   | NGYWGGTQ  | VTVSS      |            |     |
| 1u0q.A | DDTAVYCAV  | RMPYSGDYRS | SGT        |  |  |   | YDYWGGTQ  | VTVSS      |            |     |
| 1xfp.A | EDTAIYCAA  | DSTIYASYE  | CGHGLSTGGY |  |  |   | GYDSWGGTQ | VTVS       |            |     |
| 1yc7.A | EDTGMYYCOI | QCGVRSI    |            |  |  |   | REYWGGTQ  | VTVS       |            |     |
| 1zmy.A | EDTAMYCAA  | DSTIYASYE  | CGHGLSTGGY |  |  |   | GYDSWGGTQ | VTVSS      |            |     |
| 1zv5.A | EDTASYCAA  | GYNNGOCA   |            |  |  |   | TRYWGGTQ  | VTVS       |            |     |
| 1zvh.A | EDTALYCAA  | ARQWYIPLN  | SYG        |  |  |   | YNYWGGTQ  | VTVS       |            |     |
| 1zvy.A | EDTAIYTCGA | T-RKYVPRF  | ALDQSS     |  |  |   | YDYWGGTQ  | VTV        |            |     |
| 2bse.A | EDTAIYCAA  | RSGGFSSNRE | L          |  |  |   | YDGGGGTQ  | VTVSS      |            |     |
| 2p49.A | EDTAVYCAA  | GGYELRDRT  |            |  |  |   | YGQWGGTQ  | VTVSS      |            |     |
| 3cfi.A | EDTAVYCAK  | -WL--GGR   |            |  |  |   | DWYDRGGTQ | VTVS       |            |     |
| 3dwt.A | EDTAIYCAA  | VRGYFMRLPS | SHN        |  |  |   | FRYWGGTQ  | VTVSSR     |            |     |
| 3ezj.A | EDTAVYCAV  | NVKTWAGMT  |            |  |  |   | RDYWGGTQ  | VTVSS      |            |     |
| 1a6t.H | EDSAVYCAR  | RDDYY      |            |  |  |   | FDVWGGTQ  | VT         |            |     |
| 1bj1.H | EDTAVYCAK  | YPHYGSS    | HWY        |  |  |   | FDVWGGTQ  | VT         |            |     |
| 1bq1.H | EDSGVYCLH  | GNYP       |            |  |  |   | FDVWGGTQ  | VT         |            |     |
| 1cgs.H | EDSAVYCTR  | GYSS       |            |  |  |   | MDYWGGTQ  | VT         |            |     |
| 1clz.H | EDTAMYCAR  | GLDDG      | AW         |  |  |   | FAYWGGTQ  | VT         |            |     |
| 1dba.H | EDTAVYCTR  | GDYVNWY    |            |  |  |   | FDVWGGTQ  | VT         |            |     |
| 1dqq.H | EDTAVYCAS  | WG         |            |  |  |   | GDVWGGTQ  | VTVSS      |            |     |
| 1f58.H | EDTAVYCAR  | EEAMPYGNOA | YYYA       |  |  |   | MDCWGGTQ  | VTVSS      |            |     |
| 1fbi.H | EDSAVYCAS  | LYYGTSTYGV |            |  |  |   | LDYWGGTQ  | VT         |            |     |
| 1fgn.H | EDTAVYCAR  | DNSYY      |            |  |  |   | FDYWGGTQ  | VT         |            |     |
| 1for.H | EDSAVYCAR  | SGNYPYA    |            |  |  |   | MDYWGGTQ  | VT         |            |     |
| 1fpt.H | DDSAVYCAR  | DFYDYDVG   |            |  |  |   | FDYWGGTQ  | VT         |            |     |
| 1g9m.H | DDTAVYFCAV | VYEGEAGEGE | YRNN       |  |  | G | FLKHWGGTQ | VTVTS      |            |     |
| 1hzh.H | ADTAVYCAR  | VGPYSWDDSP | QDNY       |  |  |   | YMDVWKGTT | VTVSS      |            |     |
| 1igm.H | EDTAIYCAK  | HRVSVLTC   |            |  |  |   | FDWGGTQ   | VT         |            |     |
| 1igt.H | EDTAMYCAR  | HGGYYA     |            |  |  |   | MDYWGGTQ  | VT         |            |     |
| 1iqd.H | DDTAVYCAV  | PDPDA      |            |  |  |   | FDIWGGTQ  | VTVSS      |            |     |
| 1jhl.H | EDSAVYCTR  | DDNYGA     |            |  |  |   | MDYWGGTQ  | VT         |            |     |
| 1jpt.H | EDTAVYCAR  | DTAAY      |            |  |  |   | FDYWGGTQ  | VT         |            |     |
| 1k4c.H | EDSAVYCAR  | ERGDGY     |            |  |  |   | FAYWGGTQ  | VT         |            |     |
| 1kb5.H | EDSAVYCAR  | SRTDLYY    |            |  |  |   | FDYWGGTQ  | VT         |            |     |
| 1kem.H | EDSATYCAR  | WGSYA      |            |  |  |   | MDYWGGTQ  | VT         |            |     |
| 1mcp.H | EDTAIYCAR  | NYGSS      | TWY        |  |  |   | FDVWGGTQ  | VT         |            |     |
| 1mlb.H | EDSAVYCAR  | GDBG       |            |  |  |   | YGYWGGTQ  | VT         |            |     |
| 1nca.H | EDTATFFCAR | GEDNFGSL   |            |  |  |   | SDYWGGTQ  | VT         |            |     |
| 1qbl.H | EDTAVYCAV  | YDYG       |            |  |  |   | FDYWGGTQ  | VT         |            |     |
| 1tet.H | EDTAVYCAR  | RSWY       |            |  |  |   | FDVWGGTQ  | VT         |            |     |
| 1vfa.H | DDTAVYCAR  | ERDYR      |            |  |  |   | LDYWGGTQ  | VT         |            |     |
| 1wc7.H | EDSATYCVR  | DKGSYGNYP  | AW         |  |  |   | FAYWGGTQ  | VT         |            |     |
| 1ynt.H | EDSAIYCAR  | SSTWY      |            |  |  |   | FDYWGGTQ  | VT         |            |     |
| 1z3g.H | EDSAVYCAR  | GWD        |            |  |  |   | VAYWGGTQ  | VTVSA      |            |     |
| 1zan.H | EDTAVYCAR  | DGGYSSST   | LYA        |  |  |   | MDAWGGTQ  | VT         |            |     |
| 1ztx.H | EDSAVYCAR  | SASYGDY    |            |  |  |   | ADYWGHTQ  | VT         |            |     |
| 2adf.H | EDTAVYCAR  | DNPYYA     |            |  |  |   | LDYWGGTQ  | VT         |            |     |
| 2adg.H | EDTAMYCAR  | HEDGNWNY   |            |  |  |   | FDYWGGTQ  | VT         |            |     |
| 2aep.H | EDSATYCAR  | VDYGTN     |            |  |  |   | YDYWGGTQ  | VT         |            |     |
| 2ai0.H | EDTAVYCAR  | HDDYGGKS   | PYF        |  |  |   | FDVWGGTQ  | VTASS      |            |     |
| 2aj3.H | ADTAVYCAR  | YHRHFIRGPI | S          |  |  |   | FDYWRGGTQ | VT         |            |     |
| 2aju.H | EDTAVYCAR  | YDYGNT     |            |  |  |   | GDYWGGTQ  | VT         |            |     |
| 2b2x.H | EDTAVYCTR  | GFGDGGY    |            |  |  |   | FDVWGGTQ  | VT         |            |     |
| 2b4c.H | DDTAVYCAR  | DFGPDWEDGP | SYDGSGRGF  |  |  |   | FDVWGGTQ  | VTVSS      |            |     |
| 2b4n.H | EDTAVYCAR  | GVFGE      |            |  |  |   | FDYWGGTQ  | VT         |            |     |
| 2c1p.H | EDSAVYCAR  | DDYD       |            |  |  |   | GAFWGGTQ  | VTVSA      |            |     |
| 2cju.H | EDSATYCAR  | GYG        | AW         |  |  |   | FAYWGGTQ  | VT         |            |     |
| 2ddg.H | EDSAVYCAP  | Y          |            |  |  |   | GGYWGGTQ  | VTVSS      |            |     |
| 2dqu.H | EDTAMYCAR  | VSHYDGSRDW | Y          |  |  |   | FDVWGGTQ  | VT         |            |     |
| 2fbj.H | EDTALYCAR  | LHYYGY     |            |  |  |   | NAYWGGTQ  | VT         |            |     |
| 2fd6.H | EDSAVYCAR  | WGPHWY     |            |  |  |   | FDVWGGTQ  | VT         |            |     |
| 2fjg.H | EDTAVYCAR  | FVFFLPYA   |            |  |  |   | MDYWGGTQ  | VT         |            |     |
| 2fjh.H | EDTAVYCAR  | WGHSTSPWA  |            |  |  |   | MDYWGGTQ  | VT         |            |     |
| 2g5b.H | EDSATYCVR  | DNGSDY     | RWY        |  |  |   | FDVWGGTQ  | VT         |            |     |
| 2h1p.H | EDTALYCAR  | RDSSASLY   |            |  |  |   | FDYWGGTQ  | VT         |            |     |
| 2h2p.H | EDTALYCAR  | LYYGYWY    |            |  |  |   | FDVWGGTQ  | VT         |            |     |
| 2jel.H | EDSAIYCAR  | VMGEQY     |            |  |  |   | FDVWGGTQ  | VT         |            |     |

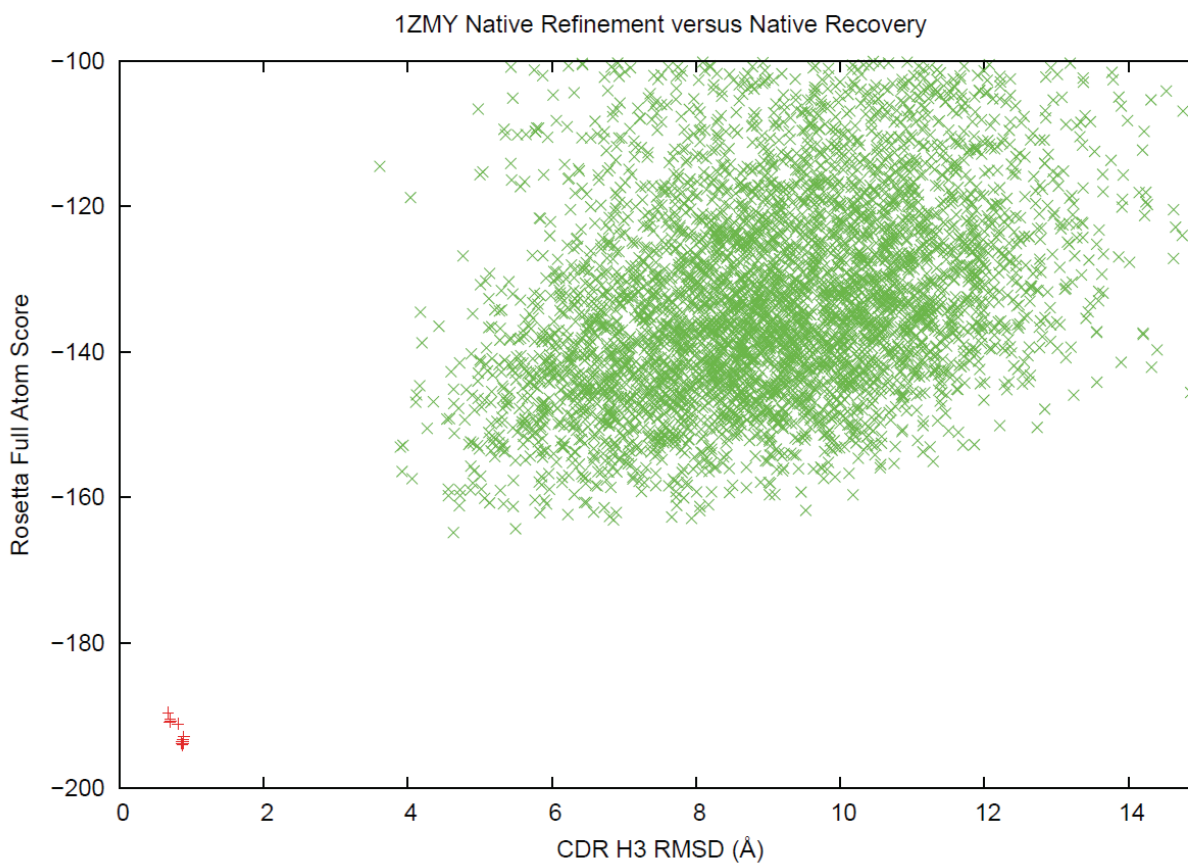

**Supplementary Figure 2:** Plot of Rosetta energies of models versus RMSD from the native crystal structure in Ångstroms, comparing refinement of crystal conformation (red) and *ab initio* loop building (green) of the CDR H3 loop in the native crystal environment.

## Rosetta Command Lines

The protocols used in this paper are available in Rosetta 3.2 (Fall 2010) using the following command lines, where `$ROSETTA3` and `$ROSETTA3DB` are environment variables pointing to the Rosetta 3.0 source and database paths. `$RosettaAntibody` is the environment variable pointing to the RosettaAntibody directory, typically `$ROSETTA3/antibody`.

### CDR Grafting

```
$ROSETTA3/antibody_mode.default.linuxgccrelease
  -database $ROSETTA3DB -nstruct 1
  -s FR02.pdb -native 1mvf.pdb -in::file::fullatom -out::file::fullatom -
  out::prefix aa
  -graft_h1 -graft_h2 -graft_h3 -camelid
  -ex1aro -ex1 -ex2
  -detect_disulf true -run::rebuild_disulf true -run::find_disulf true
  -mute core -unmute protocols.AntibodyModeler -out::level 550
```

### CDR H3 Loop Modeling

```
$ROSETTA3/antibody_mode.default.linuxgccrelease
  -database $ROSETTA3DB -nstruct 5000
  -s FR02.pdb -in::file::native 1mvf.pdb -in::file::fullatom -out::file::fullatom -
  out::prefix aa
  -model_h3 -camelid -constraints::cst_file camelid.cst
  -loops::strict_loops -loops::frag_sizes 9 3 -loops::frag_files
  aaFR02_09_05.200_v1_3 aaFR02_03_05.200_v1_3
  -ex1aro -ex1 -ex2
  -mute core -unmute protocols.AntibodyModeler -out::level 550
  -in::fix_disulf FR02.disulf -run::rebuild_disulf [optional flags: only if H1 and
  H3 both have CYS]
```

### Master Script

The cAb V<sub>H</sub>H sequence should be provided in a file, e.g. `query_h.fasta`. A master script executed from the directory containing the FASTA sequence will carry out all steps necessary for camelid antibody modeling:

```
perl -P $RosettaAntibody/scripts/ram_buildloop_wrapper.pl pdb1xyz_chothia.pdb 1 1 1 1
  1 1 5000 query_h.fasta camelid
```

### Fragments

Protein fragments must be built for loop building. H3 sequences plus one N-terminal and two C-terminal step residues can be submitted to the Robetta server (<http://www.robetta.org>) or generated with the `nn_make.pl` script included in the Rosetta2.x distribution.
